# Supplementary material for: Oxygen redox chemistry in P2-Na0.6Li0.11Fe0.27Mn0.62O2 cathode for high-energy Na-ion batteries
Source: Royal Society of Chemistry journal article supplement (doi:10.1039/d1ta08471b), 2021-01-01
Supplement: d1ta08471b1.pdf [file d1ta08471b1.pdf]

## Electronic Supplementary Information

### **A novel P2-Na<sub>0.6</sub>Li<sub>0.11</sub>Fe<sub>0.27</sub>Mn<sub>0.62</sub>O<sub>2</sub> cathode with oxygen redox reaction for high-energy Na-ion batteries**

Ming-Hui Cao<sup>\*a,b</sup>, Ren-Yan Li<sup>a</sup>, Shi-Ya Lin<sup>a</sup>, Shao-Di Zheng<sup>a</sup>, Lu Ma<sup>c</sup>, Sha Tan<sup>d</sup>, Enyuan Hu<sup>d</sup>, Zulipiya Shadike<sup>\*e</sup>, Xiao-Qing Yang<sup>\*d</sup> and Zheng-Wen Fu<sup>\*b</sup>

<sup>a</sup> Jiangxi Province Key Laboratory of Polymer Micro/Nano Manufacturing and Devices, East China University of Technology, Nanchang, 330013, China

E-mail: mhcao@ecut.edu.cn

<sup>b</sup> Shanghai Key Laboratory of Molecular Catalysis and Innovative Materials, Department of Chemistry, Fudan University, Shanghai, 200433, P. R. China

E-mail: zwfu@fudan.edu.cn

<sup>c</sup> National Synchrotron Light Source II, Brookhaven National Laboratory, Upton, NY, 11973, USA

<sup>d</sup> Chemistry Division, Brookhaven National Laboratory, Upton, NY 11973, USA

E-mail: xyang@bnl.gov

<sup>e</sup> Institute of Fuel Cells, School of Mechanical Engineering, Shanghai Jiao Tong University, Shanghai, 200240, China

E-mail: zshadike@sjtu.edu.cn

**Table S1.** Stoichiometry from inductively coupled plasma-atomic emission spectrometry (ICP-AES) results of NLFMO.

| Elements | Content(mg/kg) | mol ratio |
|----------|----------------|-----------|
| Na       | 14.70          | 0.59(7)   |
| Li       | 0.81           | 0.10(8)   |
| Fe       | 16.28          | 0.27(4)   |
| Mn       | 36.30          | 0.61(8)   |

**Table S2.** Refined crystallographic parameters by Rietveld analysis for NLFMO. S.G.  $P63/mmc$ ,  $a = b = 2.84(2)$  Å,  $c = 10.87(2)$  Å,  $\alpha = \beta = 90^\circ$ ,  $\gamma = 120^\circ$ ,  $R_{wp} = 9.72\%$ ,  $\chi^2 = 0.6265$ .

| Atom                                                                                                                                           | Site | $x$ | $y$ | $z$    | Occupancy | Uiso     |
|------------------------------------------------------------------------------------------------------------------------------------------------|------|-----|-----|--------|-----------|----------|
| Na1                                                                                                                                            | $2d$ | 1/3 | 2/3 | 3/4    | 0.303(3)  | 2.3(3)   |
| Na2                                                                                                                                            | $2b$ | 0   | 0   | 1/4    | 0.297(2)  | 2.3(3)   |
| Li                                                                                                                                             | $2a$ | 0   | 0   | 0      | 0.114(1)  | 1        |
| Fe                                                                                                                                             | $2a$ | 0   | 0   | 0      | 0.268(8)  | 0.34(7)  |
| Mn                                                                                                                                             | $2a$ | 0   | 0   | 0      | 0.62      | 0.35(6)  |
| O                                                                                                                                              | $4f$ | 1/3 | 2/3 | 0.0872 | 1         | 0.89(88) |
| $P63/mmc$ : $a = b = 2.8420(8)$ Å $c = 10.8722(4)$ Å $V = 75.940(2)$ Å <sup>3</sup><br>$R_p = 5.70\%$ $R_{wp} = 9.72\%$ $GOF(\chi^2) = 0.6265$ |      |     |     |        |           |          |

Rietveld refinement was conducted using hexagonal space group  $P63/m$  and by placing Mn, Fe, Li ions in octahedral sites of the transition-metal layer and Na ions at the two trigonal prismatic sites in the alkaline metal layer. The refinement shows excellent goodness of fit with this model ( $GOF(\chi^2) = 0.6265$ ), which confirms the proposed structural model. The similar structural model was also reported in  $P2-Na_{0.66}Li_{0.18}Fe_{0.12}Mn_{0.7}O_2$  cathode material. <sup>[S1]</sup>

**Table S3.** Comparison of the electrochemical properties of layered cathode materials for sodium ion batteries based on anionic redox.

|                | <b>Electrode materials</b>                                                                                     | <b>Voltage range (V)</b> | <b>Initial reversible capacity (mAh/g)</b> | <b>Reference</b> |
|----------------|----------------------------------------------------------------------------------------------------------------|--------------------------|--------------------------------------------|------------------|
| Li-doping      | P2-Na <sub>0.6</sub> Li <sub>0.2</sub> Mn <sub>0.8</sub> O <sub>2</sub>                                        | 2.0-4.6                  | 162(0.067C)                                | S2               |
|                | P3-Na <sub>0.6</sub> Li <sub>0.2</sub> Mn <sub>0.8</sub> O <sub>2</sub>                                        | 2.0-4.5                  | 123(0.1C)                                  | S3               |
|                | P2-Na <sub>0.72</sub> Li <sub>0.24</sub> Mn <sub>0.76</sub> O <sub>2</sub>                                     | 1.5-4.5                  | 270(0.05C)                                 | S4               |
|                | P2-Na <sub>0.66</sub> Li <sub>0.18</sub> Fe <sub>0.12</sub> Mn <sub>0.7</sub> O <sub>2</sub>                   | 1.5-4.5                  | 214(0.05C)                                 | S1               |
|                | P2-Na <sub>0.66</sub> Li <sub>0.22</sub> Ru <sub>0.78</sub> O <sub>2</sub>                                     | 1.5-4.5                  | 158(0.1C)                                  | S5               |
|                | P2-Na <sub>0.75</sub> Li <sub>0.2</sub> Mg <sub>0.05</sub> Al <sub>0.05</sub> Mn <sub>0.7</sub> O <sub>2</sub> | 1.5-4.5                  | 245(0.05C)                                 | S6               |
|                | P2-Na <sub>0.72</sub> Li <sub>0.24</sub> Ti <sub>0.1</sub> Mn <sub>0.66</sub> O <sub>2</sub>                   | 1.5-4.5                  | 194(0.05C)                                 | S7               |
| Mg-doping      | P2-Na <sub>2/3</sub> Mg <sub>0.28</sub> Mn <sub>0.72</sub> O <sub>2</sub>                                      | 2.0-4.5                  | 150(0.1C)                                  | S8               |
|                | P3-Na <sub>2/3</sub> Mg <sub>1/3</sub> Mn <sub>2/3</sub> O <sub>2</sub>                                        | 1.5-4.5                  | 225(0.1C)                                  | S9               |
|                | P2-Na <sub>0.7</sub> Mn <sub>0.6</sub> Ni <sub>0.2</sub> Mg <sub>0.2</sub> O <sub>2</sub>                      | 1.5-4.2                  | 130(0.2C)                                  | S10              |
| Zn-doping      | P2-Na <sub>2/3</sub> [Zn <sub>0.3</sub> Mn <sub>0.7</sub> ]O <sub>2</sub>                                      | 1.5-4.6                  | 190(0.1C)                                  | S11              |
|                | P2-Na <sub>2/3</sub> [(Ni <sub>0.5</sub> Zn <sub>0.5</sub> ) <sub>0.3</sub> Mn <sub>0.7</sub> ]O <sub>2</sub>  | 2.3-4.6                  | 103(0.1C)                                  | S12              |
| Vacancy-doping | Na <sub>4/7</sub> [Mn <sub>6/7</sub> (□ <sub>Mn</sub> ) <sub>1/7</sub> ]O <sub>2</sub>                         | 1.5-4.4                  | 220(0.1C)                                  | S13              |
|                | P2-Na <sub>0.78</sub> Ni <sub>0.23</sub> Mn <sub>0.69</sub> O <sub>2</sub>                                     | 2.0-4.5                  | 138(0.1C)                                  | S14              |
|                | Na <sub>4/7-x</sub> [□ <sub>1/7</sub> Mn <sub>6/7</sub> ]O <sub>2</sub>                                        | 1.5-4.7                  | 200(0.05C)                                 | S15              |
|                | P2-Na <sub>2/3</sub> Ni <sub>1/3</sub> Mn <sub>2/3</sub> O <sub>2</sub>                                        | 1.5-4.5                  | 228(0.05C)                                 | S16              |
|                | P2-Na <sub>0.67</sub> Cu <sub>0.28</sub> Mn <sub>0.72</sub> O <sub>2</sub>                                     | 2.0-4.5                  | 104(0.1C)                                  | S17              |

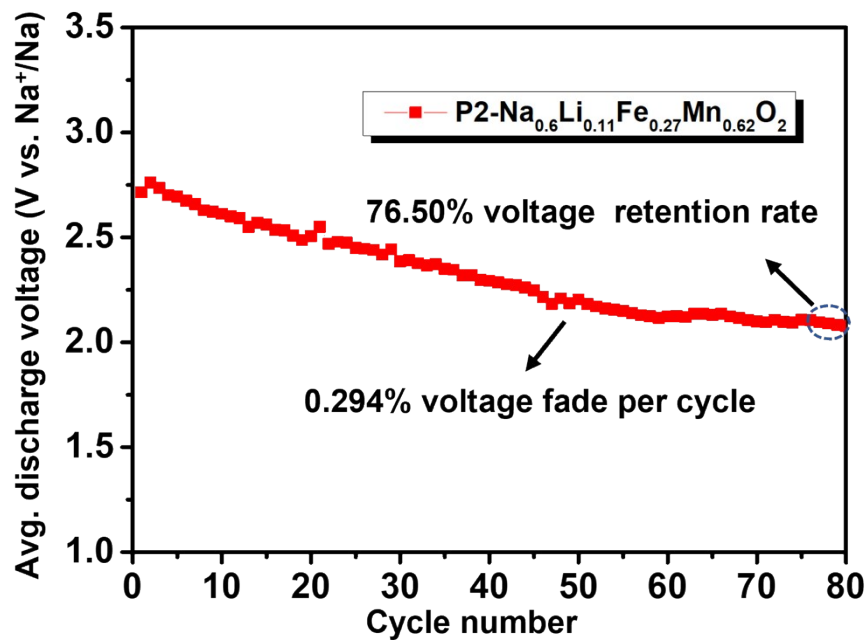

**Figure S1.** Average discharge voltage vs. cycle number plot of P2-NLFMO.

The average discharge voltages are plotted against cycle numbers and shown in **Figure S1**. It can be seen that the average discharge voltage decreases from 2.7154 to 2.0774 V ( $\Delta E=0.638$  V) with a voltage retention rate as 76.50% after 80 cycles for P2- $\text{Na}_{0.6}\text{Li}_{0.11}\text{Fe}_{0.27}\text{Mn}_{0.62}\text{O}_2$ , indicating a serious voltage decay.

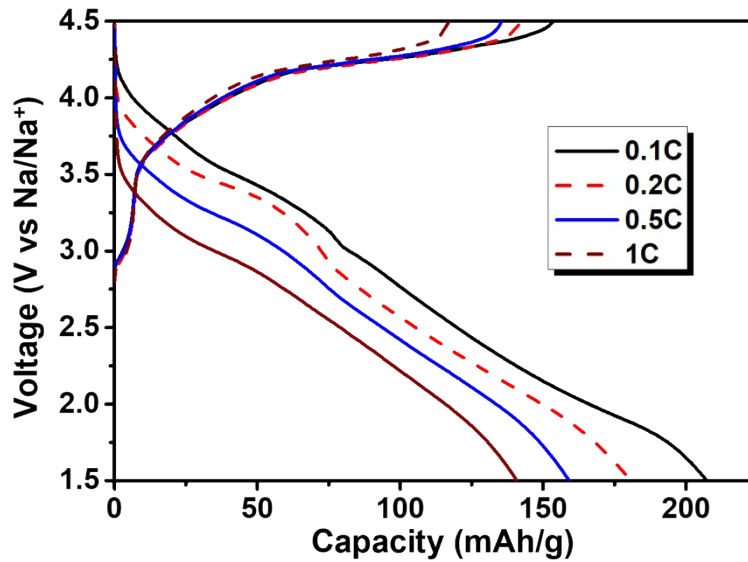

**Figure S2.** The charge and discharge voltage profiles with different current rate (0.1C-1C) for P2-NLFMO in Na half-cells.

**Figure S2** shows the charge and discharge voltage profiles with different current rate (0.1C-1C) for P2-NLFMO in Na half-cells. It can be seen that the  $\text{Na}_{0.6}\text{Li}_{0.11}\text{Fe}_{0.27}\text{Mn}_{0.62}\text{O}_2$  electrode exhibits the average discharge voltage of 2.7154, 2.6888, 2.6872 and 2.6078 V at C/10, C/5, C/2 and 1C rates, respectively. The result indicates that a severe voltage decay is the main factor leading to the poor rate capability of P2-NLFMO.

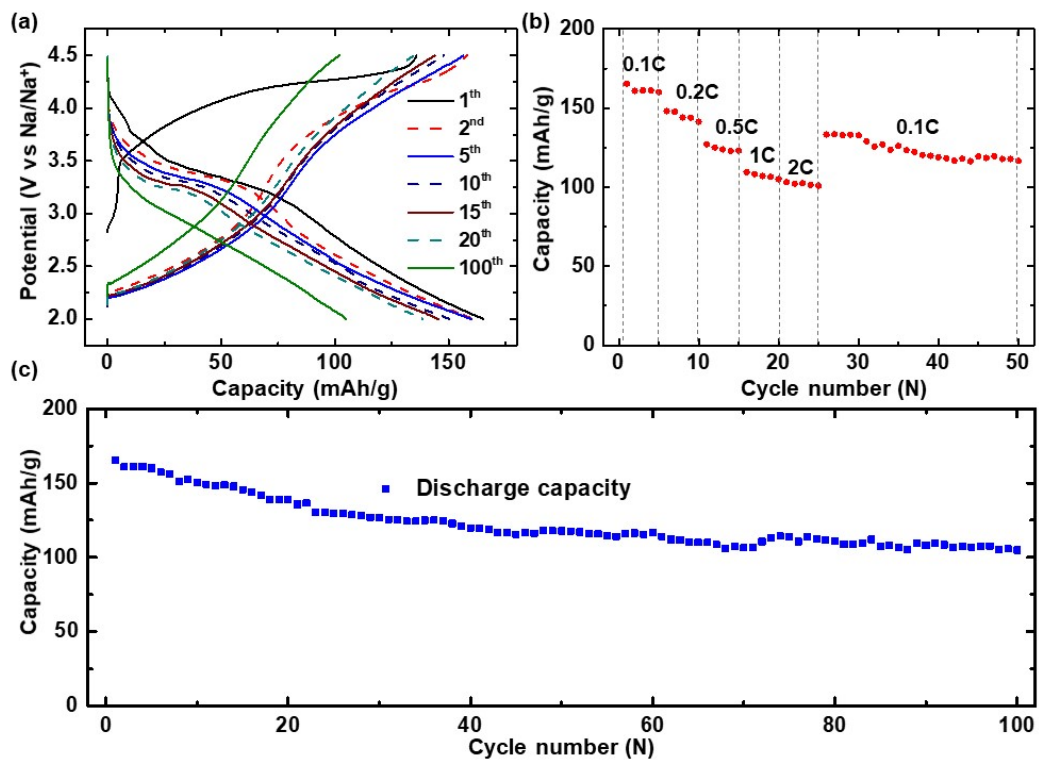

**Figure S3.** (a) Representative charge/discharge curves at 0.1C in the voltage range of 2.0-4.5 V, (b) Rate capability (0.1C-1C), (c) Charge/discharge capacity and Coulombic efficiency as a function of cycle number.

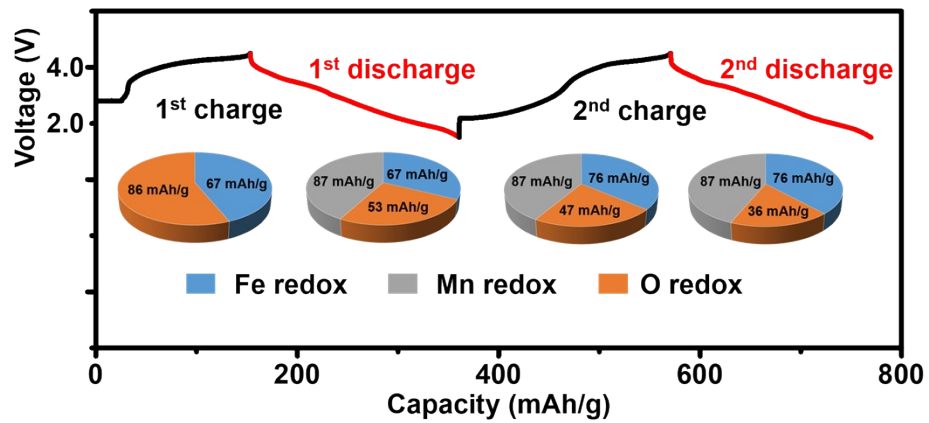

**Figure S4.** The capacity contributions of Fe redox, Mn redox and oxygen redox during the initial two cycles.



## References

- [S1] L. Yang, X. Li, J. Liu, S. Xiong, X. Ma, P. Liu, J. Bai, W. Xu, Y. Tang, Y. -Y. Hu, M. Liu and H. Chen, *J. Am. Chem. Soc.*, 2019, **141**, 6680-6689.
- [S2] E. de la Llave, E. Talaie, E. Levi, P. K. Nayak, M. Dixit, P. T. Rao, P. Hartmann, F. Chesneau, D. T. Major, M. Greenstein, D. Aurbach and L. F. Nazar, *Chem. Mater.*, 2016, **28**, 9064-9076.
- [S3] K. Du, J. Zhu, G. Hu, H. Gao, Y. Li and J. B. Goodenough, *Energy Environ. Sci.*, 2016, **9**, 2575-2577.
- [S4] X. Rong, E. Hu, Y. Lu, F. Meng, C. Zhao, X. Wang, Q. Zhang, X. Yu, L. Gu, Y. -S. Hu, H. Li, X. Huang, X. -Q. Yang, C. Delmas and L. Chen, *Joule*, 2019, **3**, 503-517.
- [S5] X. Cao, H. Li, Y. Qiao, X. Li, M. Jia, J. Cabana and H. Zhou, *Adv. Energy Mater.*, 2020, **10**, 1903785.
- [S6] X. Chen, C. Cheng, M. Ding, Y. Xia, L. Y. Chang, T. S. Chan, H. Tang, N. Zhang and L. Zhang, *ACS Appl. Mater. Interfaces*, 2020, **12**, 43665-43673.
- [S7] C. Li, C. Zhao, B. Hu, W. Tong, M. Shen and B. Hu, *Chem. Mater.*, 2020, **32**, 1054-1063.
- [S8] U. Maitra, R. A. House, J. W. Somerville, N. Tapia-Ruiz, J. G. Lozano, N. Guerrini, R. Hao, K. Luo, L. Jin, M. A. Pérez-Osorio, F. Massel, D. M. Pickup, S. Ramos, X. Lu, D. E. McNally, A. V. Chadwick, F. Giustino, T. Schmitt, L. C. Duda, M. R. Roberts and P. G. Bruce, *Nature Chem.*, 2018, **10**, 288-295.
- [S9] B. Song, E. Hu, J. Liu, Y. Zhang, X. Q. Yang, J. Nanda and K. Page, *J. Mater. Chem. A*, 2019, **7**, 1491-1498.
- [S10] Q. C. Wang, J. K. Meng, X. Y. Yue, Q. Q. Qiu, Y. Song, X. J. Wu, Z. -W. Fu, Y. -Y. Xia, Z. Shadik, J. Wu, X. -Q. Yang and Y. N. Zhou, *J. Am. Chem. Soc.*, 2018, **141**, 840-848.
- [S11] A. Konarov, J. H. Jo, J. U. Choi, Z. Bakenov, H. Yashiro, J. Kim and S. T. Myung, *Nano energy*, 2019, **59**, 197-206.
- [S12] A. Konarov, H. J. Kim, J. H. Jo, N. Voronina, Y. Lee, Z. Bakenov, J. Kim and S. T. Myung, *Adv. Energy Mater.*, 2020, **10**, 2001111.
- [S13] Y. Li, X. Wang, Y. Gao, Q. Zhang, G. Tan, Q. Kong, S. Bak, G. Lu, X. -Q. Yang, L. Gu, J. Lu, K. Amine, Z. Wang and L. Chen, *Adv. Energy Mater.*, 2019, **9**, 1803087.
- [S14] C. Ma, J. Alvarado, J. Xu, R. J. Clément, M. Kodur, W. Tong, C. P. Grey and Y. S. Meng, *J. Am. Chem. Soc.*, 2017, **139**, 4835-4845.
- [S15] B. Mortemard de Boisse, S. I. Nishimura, E. Watanabe, L. Lander, A. Tsuchimoto, J. Kikkawa, E. Kobayashi, D. Asakura, M. Okubo and A. Yamada, *Adv. Energy Mater.*, 2018, **8**, 1800409.
- [S16] T. Risthaus, D. Zhou, X. Cao, X. He, B. Qiu, J. Wang, L. Zhang, Z. Liu, E. Paillard, G. Schumacher, M. Winter and J. Li, *J. Power Sources*, 2018, **395**, 16-24.
- [S17] W. Zheng, Q. Liu, Z. Wang, Z. Wu, S. Gu, L. Cao, K. Zhang, J. Fransaer and Z. Lu, *Energy Storage Mater.*, 2020, **28**, 300-306.
